# Supplementary material for: An Exact Algorithm for Multicommodity Network Design Under Stochastic Interdictions
Source: Atypon-hosted journal article supplement (doi:10.1287/ijoc.2023.0286), 2025-01-09
Supplement: ijoc.2023.0286.sm1.pdf [file ijoc.2023.0286.sm1.pdf]

## Online Supplements for “An Exact Algorithm for Multicommodity Network Design under Stochastic Interdictions”

Shabnam Mahmoudzadeh Vaziri<sup>a,c</sup>, Onur Kuzgunkaya<sup>a</sup>, Navneet Vidyarthi<sup>b,c</sup>

<sup>a</sup>Gina Cody School of Engineering and Computer Science, Concordia University, Montreal, Canada

<sup>b</sup>John Molson School of Business, Concordia University, Montreal, Canada

<sup>c</sup>Interuniversity Research Centre on Enterprise Networks, Logistics and Transportation (CIRRELT), Montreal, Canada

### Appendix A: Proofs of the lemma and propositions

In this appendix, we first prove the equivalence of  $MCF_s$  and  $PMCF_s$  formulations.

LEMMA 1. *Let  $M$  be a large number and  $\bar{v}(\hat{x})$  be an optimal solution of  $PMCF_s$  for any  $\hat{x} \in X$ . Then we have  $\bar{v}(\hat{x})_{hs}^k = 0, \forall k \in K$  if  $\hat{x}_h = 1$  for any  $\hat{x} \in X$ .*

*Proof.* Since  $M$  is a large number if  $\hat{x} = 1$  and  $v(\hat{x}) > 0$ , a strictly better solution exists in which  $v(\hat{x}) = 0$ , achieved by reallocating flows from paths containing arc  $h$  to the dummy arcs in the network, resulting in lower costs. Therefore, if  $\hat{x} = 1$ ,  $v(\hat{x})$  should be zero. This completes the proof.  $\square$

PROPOSITION 1. *Given any  $\hat{x} \in X$ , let  $MCF_s(\hat{x})$  and  $PMCF_s(\hat{x})$  denote the designer’s solutions to  $MCF_s$  and  $PMCF_s$ , respectively. Then  $MCF_s(\hat{x})$  has an optimal solution  $v(\hat{x})$  if and only if  $v(\hat{x})$  is optimal to  $PMCF_s(\hat{x})$ . Furthermore, the optimal objective function value of  $MCF_s(\hat{x})$  is equal to the objective function value of  $PMCF_s(\hat{x})$ .*

*Proof.* We first show that the objective function value of  $PMCF_s$  remains less than or equal to the objective function value of  $MCF_s$ . Consider an optimal solution  $v(\hat{x})$  to  $MCF_s$  with an objective function value of  $v^*$ . Since  $PMCF_s(\hat{x})$  is a relaxation of  $MCF_s(\hat{x})$ ,  $v(\hat{x})$  is also feasible for  $PMCF_s(\hat{x})$ . Moreover, we have  $\sum_{h \in A} \sum_{k \in K} (r_h^k + M\hat{x}_{hs})v_{hs}^k = v^*$  because  $\sum_{h \in A} \sum_{k \in K} r_h^k v_{hs}^k = v^*$  and Lemma 1 ensures that  $\sum_{h \in A} \sum_{k \in K} M\hat{x}_{hs}v_{hs}^k = 0$ . Therefore, the optimal objective function value of  $PMCF_s(\hat{x})$  does not exceed  $v^*$ .

Furthermore, we show that the optimal objective function value of  $MCF_s(\hat{x})$  does not exceed the optimal objective function value of  $PMCF_s(\hat{x})$ , leading to the equivalence of these two values. Let  $v(\hat{x})$  be an optimal solution to  $PMCF_s$  with an objective function value of  $v^*$ . Since Lemma 1 guarantees that  $v_{hs}^k(\hat{x}) = 0$  for  $\hat{x}_{hs} = 1$ ,  $v(\hat{x})$  is a feasible solution for  $MCF_s(\hat{x})$  with the objective function value  $\sum_{h \in A} \sum_{k \in K} r_h^k v_{hs}^k = v^*$ , which provides a lower bound on the optimal objective function value of  $MCF_s(\hat{x})$ . This completes the proof.  $\square$

Next, we prove the validity of the proposed supervalid inequality.

PROPOSITION 2. Consider the Benders cut  $\eta_s + \sum_{h \in A} q_h w_h (\hat{\alpha}_{hs} - \hat{\varphi}_{hs}) \geq \sum_{k \in K} d^k (\hat{\pi}_{O_{ks}}^k - \hat{\pi}_{D_{ks}}^k)$  is added to the MP. The following inequality is supervalid inequality:

$$\sum_{h \in A} I(\hat{\alpha}_{hs} - \hat{\varphi}_{hs}) w_h \geq 1, \quad \text{where } I(\hat{\alpha}_{hs} - \hat{\varphi}_{hs}) = \begin{cases} 1, & \text{if } \hat{\alpha}_{hs} - \hat{\varphi}_{hs} > 0 \\ 0, & \text{otherwise} \end{cases}$$

*Proof.* We prove this by contradiction. It demonstrates that if we assume that the incumbent solution is not optimal, it leads to a contradiction, thus confirming the necessity of the inequality being at least 1 in an optimal solution. This establishes the supervalidity of the stated inequality in the given context of the Benders cut. The following steps prove the Proposition:

The statement supposes that a feasible solution  $(\hat{w}, \hat{\pi}, \hat{\alpha}, \hat{\varphi})$  generates the Benders cut  $\eta_s + \sum_{h \in A} q_h w_h (\hat{\alpha}_{hs} - \hat{\varphi}_{hs}) \geq \sum_{k \in K} d^k (\hat{\pi}_{O_{ks}}^k - \hat{\pi}_{D_{ks}}^k)$ . Let  $\hat{\eta}_s = \sum_{k \in K} d^k (\hat{\pi}_{O_{ks}}^k - \hat{\pi}_{D_{ks}}^k) - \sum_{h \in A} q_h \hat{w}_h (\hat{\alpha}_{hs} - \hat{\varphi}_{hs})$  and let  $(w^*, y^*, \eta^*)$  denote the optimal solution to the MP. Note that  $\sum_{h \in A} I(\hat{\alpha}_{hs} - \hat{\varphi}_{hs}) w_h^* = 0$  or  $\geq 1$  holds.  $\sum_{h \in A} I(\hat{\alpha}_{hs} - \hat{\varphi}_{hs}) w_h^* = 0$  implies that (i)  $w_h^* = 0$  or (ii)  $I(\hat{\alpha}_{hs} - \hat{\varphi}_{hs}) = 0$  hold for all  $h \in A$ . In the latter case, based on the definition of  $I(\hat{\alpha}_{hs} - \hat{\varphi}_{hs})$ ,  $\hat{\alpha}_{hs} - \hat{\varphi}_{hs} \leq 0$  holds. Since the maximum value of  $\hat{\varphi}_{hs}$  is  $\hat{\alpha}_{hs}$ ,  $\hat{\alpha}_{hs} - \hat{\varphi}_{hs}$  would be zero, implying that  $\sum_{h \in A} q_h w_h^* (\hat{\alpha}_{hs} - \hat{\varphi}_{hs}) = 0$ . In general, we can thus conclude from  $\sum_{h \in A} I(\hat{\alpha}_{hs} - \hat{\varphi}_{hs}) w_h^* = 0$  that  $\sum_{h \in A} q_h w_h^* (\hat{\alpha}_{hs} - \hat{\varphi}_{hs}) w_h = 0$ .

When  $\sum_{h \in A} I(\hat{\alpha}_{hs} - \hat{\varphi}_{hs}) w_h^* = 0$ ,

$$\begin{aligned} \eta_s^* &\geq \sum_{k \in K} d^k (\hat{\pi}_{O_{ks}}^k - \hat{\pi}_{D_{ks}}^k) - \sum_{h \in A} q_h w_h^* (\hat{\alpha}_{hs} - \hat{\varphi}_{hs}) \text{ is true for any } (\hat{\pi}, \hat{\alpha}, \hat{\varphi}), \\ &= \hat{\eta}_s - \sum_{h \in A} q_h w_h^* (\hat{\alpha}_{hs} - \hat{\varphi}_{hs}) + \sum_{h \in A} q_h \hat{w}_h (\hat{\alpha}_{hs} - \hat{\varphi}_{hs}) \\ &\geq \hat{\eta}_s \text{ because } \sum_{h \in A} q_h w_h^* (\hat{\alpha}_{hs} - \hat{\varphi}_{hs}) = 0 \\ &\geq \bar{\eta}_s \text{ because } \hat{w} \text{ does not need to be the incumbent solution and} \\ &> \eta_s^* \text{ by assumption; but this is a contradiction.} \end{aligned}$$

Therefore, if the incumbent solution is not optimal,  $\sum_{h \in A} I(\hat{\alpha}_{hs} - \hat{\varphi}_{hs}) w_h^* \geq 1$  must be true for every optimal solution  $(w^*, y^*, \eta^*)$ . Hence, the inequality  $\sum_{h \in A} I(\hat{\alpha}_{hs} - \hat{\varphi}_{hs}) w_h \geq 1$  is supervalid.  $\square$

## Appendix B: Smith et al. (2007)'s Algorithm

In this appendix, we present the pseudo-code of the algorithm presented by Smith et al. (2007)'s Algorithm. We define  $UB$  as an upper bound on the optimal objective value obtained by solving the scenario SPs,  $LB$  as a lower bound on the optimal objective value obtained by solving the MP, and  $t$  as the current iteration. Let  $\Upsilon^t$  be the set of extreme points generated up to iteration  $t$ , and  $\epsilon$  be the desirable optimality gap. The algorithm is detailed as follows:

---

**Algorithm 1** Smith et al. (2007)'s Algorithm's

---

$UB \leftarrow \infty, LB \leftarrow -\infty, t \leftarrow 0, \Upsilon^t \leftarrow \emptyset$

**While**  $(\frac{UB - LB}{UB} > \epsilon)$  **do**

    Solve the MP to obtain  $w$

    Update  $LB$

**For**  $s \in S$ , Solve the SP <sub>$s$</sub>  for a given  $\hat{w}$  and obtain dual variables  $(\pi, \alpha, \varphi)$

**End for**

    Update  $UB$

$\Upsilon^{t+1} \leftarrow \Upsilon^t \cup \{\pi, \alpha, \varphi\}$

$t \leftarrow t + 1$

**End while**

---

## Appendix C: Test Instances

In this Appendix, we present the details of publicly available Set “R” instances in Table S1 (Frangioni, 2024), used in several papers on the MCNDP and described in detail by Cricanic et al. (2001). There are 18 sets of nine problem instances, denoted by “R01” to “R18” where each instance has different arc capacities and fixed design cost.

**Table S1** Details of Test Instances (Set R01 to R18)

| Set | Node ( $ N $ ) | Arc ( $ A $ ) | Commodity ( $ K $ ) | No. of scenarios | Interdiction budget |
|-----|----------------|---------------|---------------------|------------------|---------------------|
| R01 | 10             | 35            | 10                  | 2                | 1, 2                |
|     |                |               |                     | 3                | 1, 2, 3             |
|     |                |               |                     | 4                | 1, 2, 3, 4          |
| R02 | 10             | 35            | 25                  | 2                | 1, 2                |
|     |                |               |                     | 3                | 1, 2, 3             |
|     |                |               |                     | 4                | 1, 2, 3, 4          |
| R03 | 10             | 35            | 50                  | 2                | 1, 2                |
|     |                |               |                     | 3                | 1, 2, 3             |
|     |                |               |                     | 4                | 1, 2, 3, 4          |
| R04 | 10             | 60            | 10                  | 2                | 1, 2                |
|     |                |               |                     | 3                | 1, 2, 3             |
|     |                |               |                     | 4                | 1, 2, 3, 4          |
| R05 | 10             | 60            | 25                  | 2                | 1, 2                |
|     |                |               |                     | 3                | 1, 2, 3             |
|     |                |               |                     | 4                | 1, 2, 3, 4          |
| R06 | 10             | 60            | 50                  | 2                | 1, 2                |
|     |                |               |                     | 3                | 1, 2, 3             |
|     |                |               |                     | 4                | 1, 2, 3, 4          |
| R07 | 10             | 82            | 10                  | 2                | 1, 2                |
|     |                |               |                     | 3                | 1, 2, 3             |
|     |                |               |                     | 4                | 1, 2, 3, 4          |
| R08 | 10             | 83            | 25                  | 2                | 1, 2                |
|     |                |               |                     | 3                | 1, 2, 3             |
|     |                |               |                     | 4                | 1, 2, 3, 4          |
| R09 | 10             | 83            | 50                  | 2                | 1, 2                |
|     |                |               |                     | 3                | 1, 2, 3             |
|     |                |               |                     | 4                | 1, 2, 3, 4          |
| R10 | 20             | 120           | 40                  | 2                | 1, 2                |
|     |                |               |                     | 3                | 1, 2, 3             |
|     |                |               |                     | 4                | 1, 2, 3, 4          |
| R11 | 20             | 120           | 100                 | 2                | 1, 2                |
|     |                |               |                     | 3                | 1, 2, 3             |
|     |                |               |                     | 4                | 1, 2, 3, 4          |
| R12 | 20             | 120           | 200                 | 2                | 1, 2                |
|     |                |               |                     | 3                | 1, 2, 3             |
|     |                |               |                     | 4                | 1, 2, 3, 4          |
| R13 | 20             | 220           | 40                  | 2                | 1, 2                |
|     |                |               |                     | 3                | 1, 2, 3             |
|     |                |               |                     | 4                | 1, 2, 3, 4          |
| R14 | 20             | 220           | 100                 | 2                | 1, 2                |
|     |                |               |                     | 3                | 1, 2, 3             |
|     |                |               |                     | 4                | 1, 2, 3, 4          |
| R15 | 20             | 220           | 200                 | 2                | 1, 2                |
|     |                |               |                     | 3                | 1, 2, 3             |
|     |                |               |                     | 4                | 1, 2, 3, 4          |
| R16 | 20             | 314           | 40                  | 2                | 1, 2                |
|     |                |               |                     | 3                | 2, 3, 4             |
|     |                |               |                     | 4                | 1, 2, 3, 4          |
| R17 | 20             | 318           | 100                 | 2                | 1, 2                |
|     |                |               |                     | 3                | 1, 2, 3             |
|     |                |               |                     | 4                | 1, 2, 3, 4          |
| R18 | 20             | 315           | 200                 | 2                | 1, 2                |
|     |                |               |                     | 3                | 1, 2, 3             |
|     |                |               |                     | 4                | 1, 2, 3, 4          |

## Appendix D: Detailed Computational Results

The detailed results of Set R01 to R09 using the five variants of the BBC algorithm are presented in Table S2. We also present the detailed results of Set R10 to R18 for the three best variants of the BBC algorithm in Table S3. The comparison of the performance of the MibS Solver and BBC2 algorithm is presented in Table S4. The results of the performance of the BBC2 algorithm for the model with uncertain demand and interdiction budget are presented in Table S5.

**Table S2 Performance of Variants of BBC Algorithm on Set R01-R09 Instances**

| Ins. | Set | N  | A  | K  | CPU Time (s) for  S =2 |       |       |       |       | CPU Time (s) for  S =3 |       |        |        |       | CPU Time (s) for  S =4 |        |        |        |        |
|------|-----|----|----|----|------------------------|-------|-------|-------|-------|------------------------|-------|--------|--------|-------|------------------------|--------|--------|--------|--------|
|      |     |    |    |    | BBC1                   | BBC2  | BBC3  | BBC4  | BBC5  | BBC1                   | BBC2  | BBC3   | BBC4   | BBC5  | BBC1                   | BBC2   | BBC3   | BBC4   | BBC5   |
| 1    | R01 | 10 | 35 | 10 | 17                     | 5     | 14    | 17    | 5     | 21                     | 6     | 20     | 23     | 8     | 40                     | 8      | 46     | 44     | 12     |
| 2    |     | 10 | 35 | 10 | 21                     | 7     | 19    | 21    | 6     | 29                     | 9     | 26     | 30     | 8     | 40                     | 11     | 32     | 45     | 12     |
| 3    |     | 10 | 35 | 10 | 21                     | 8     | 23    | 21    | 7     | 38                     | 9     | 27     | 40     | 8     | 58                     | 12     | 50     | 62     | 14     |
| 4    |     | 10 | 35 | 10 | 14                     | 5     | 17    | 14    | 7     | 23                     | 6     | 23     | 24     | 8     | 42                     | 9      | 39     | 46     | 9      |
| 5    |     | 10 | 35 | 10 | 16                     | 7     | 17    | 17    | 7     | 28                     | 9     | 26     | 28     | 7     | 47                     | 13     | 50     | 57     | 9      |
| 6    |     | 10 | 35 | 10 | 16                     | 6     | 21    | 17    | 6     | 28                     | 8     | 27     | 29     | 9     | 40                     | 9      | 44     | 44     | 11     |
| 7    |     | 10 | 35 | 10 | 3                      | 1     | 3     | 3     | 1     | 4                      | 1     | 5      | 5      | 1     | 7                      | 1      | 8      | 8      | 1      |
| 8    |     | 10 | 35 | 10 | 5                      | 1     | 5     | 6     | 1     | 10                     | 2     | 13     | 10     | 3     | 15                     | 3      | 13     | 17     | 3      |
| 9    |     | 10 | 35 | 10 | 8                      | 2     | 7     | 8     | 2     | 12                     | 3     | 12     | 13     | 3     | 20                     | 4      | 22     | 23     | 4      |
| 10   | R02 | 10 | 35 | 25 | 21                     | 5     | 19    | 20    | 5     | 28                     | 7     | 41     | 29     | 7     | 36                     | 9      | 44     | 40     | 9      |
| 11   |     | 10 | 35 | 25 | 51                     | 14    | 57    | 40    | 19    | 47                     | 15    | 71     | 50     | 17    | 82                     | 18     | 111    | 87     | 15     |
| 12   |     | 10 | 35 | 25 | 60                     | 17    | 50    | 64    | 17    | 88                     | 29    | 91     | 86     | 26    | 100                    | 29     | 144    | 148    | 28     |
| 13   |     | 10 | 35 | 25 | 26                     | 4     | 20    | 25    | 5     | 37                     | 8     | 31     | 36     | 7     | 52                     | 10     | 49     | 54     | 11     |
| 14   |     | 10 | 35 | 25 | 23                     | 7     | 29    | 25    | 7     | 58                     | 9     | 54     | 56     | 12    | 90                     | 15     | 75     | 65     | 15     |
| 15   |     | 10 | 35 | 25 | 29                     | 5     | 25    | 28    | 6     | 55                     | 12    | 56     | 45     | 13    | 84                     | 12     | 73     | 87     | 15     |
| 16   |     | 10 | 35 | 25 | 18                     | 7     | 17    | 17    | 7     | 29                     | 7     | 22     | 28     | 7     | 31                     | 8      | 27     | 35     | 8      |
| 17   |     | 10 | 35 | 25 | 8                      | 2     | 8     | 9     | 3     | 13                     | 3     | 12     | 15     | 4     | 11                     | 4      | 15     | 14     | 5      |
| 18   |     | 10 | 35 | 25 | 18                     | 8     | 23    | 17    | 6     | 34                     | 11    | 34     | 37     | 14    | 47                     | 14     | 46     | 48     | 13     |
| 19   | R03 | 10 | 35 | 50 | 110                    | 31    | 100   | 110   | 28    | 164                    | 34    | 135    | 160    | 39    | 181                    | 41     | 151    | 253    | 48     |
| 20   |     | 10 | 35 | 50 | 122                    | 30    | 140   | 118   | 33    | 230                    | 61    | 216    | 170    | 50    | 220                    | 49     | 197    | 233    | 56     |
| 21   |     | 10 | 35 | 50 | 146                    | 29    | 119   | 125   | 36    | 235                    | 52    | 186    | 222    | 45    | 407                    | 70     | 291    | 314    | 65     |
| 22   |     | 10 | 35 | 50 | 39                     | 9     | 32    | 42    | 11    | 55                     | 13    | 49     | 56     | 18    | 71                     | 15     | 57     | 79     | 21     |
| 23   |     | 10 | 35 | 50 | 89                     | 22    | 69    | 86    | 16    | 99                     | 25    | 94     | 97     | 27    | 104                    | 26     | 100    | 107    | 28     |
| 24   |     | 10 | 35 | 50 | 89                     | 21    | 69    | 85    | 16    | 99                     | 25    | 94     | 97     | 27    | 104                    | 27     | 100    | 107    | 28     |
| 25   |     | 10 | 35 | 50 | 25                     | 14    | 26    | 27    | 14    | 32                     | 16    | 36     | 33     | 16    | 32                     | 17     | 38     | 37     | 19     |
| 26   |     | 10 | 35 | 50 | 24                     | 12    | 25    | 26    | 15    | 33                     | 19    | 32     | 33     | 17    | 33                     | 16     | 36     | 38     | 20     |
| 27   |     | 10 | 35 | 50 | 24                     | 12    | 25    | 25    | 14    | 32                     | 15    | 34     | 33     | 17    | 32                     | 18     | 35     | 36     | 18     |
| 28   | R04 | 10 | 60 | 10 | 109                    | 39    | 72    | 135   | 41    | 642                    | 102   | 224    | 780    | 118   | 619                    | 151    | 351    | 782    | 169    |
| 29   |     | 10 | 60 | 10 | 105                    | 32    | 75    | 107   | 43    | 461                    | 129   | 253    | 518    | 100   | 558                    | 149    | 385    | 632    | 228    |
| 30   |     | 10 | 60 | 10 | 113                    | 36    | 60    | 107   | 52    | 268                    | 115   | 234    | 300    | 96    | 573                    | 161    | 278    | 573    | 148    |
| 31   |     | 10 | 60 | 10 | 298                    | 52    | 112   | 260   | 77    | 287                    | 52    | 176    | 274    | 68    | 310                    | 95     | 200    | 365    | 91     |
| 32   |     | 10 | 60 | 10 | 150                    | 60    | 115   | 142   | 65    | 271                    | 70    | 201    | 252    | 89    | 439                    | 117    | 364    | 500    | 124    |
| 33   |     | 10 | 60 | 10 | 143                    | 60    | 96    | 139   | 70    | 185                    | 85    | 180    | 171    | 82    | 290                    | 77     | 347    | 304    | 94     |
| 34   |     | 10 | 60 | 10 | 29                     | 5     | 17    | 35    | 7     | 68                     | 12    | 38     | 64     | 7     | 63                     | 14     | 49     | 59     | 11     |
| 35   |     | 10 | 60 | 10 | 17                     | 5     | 14    | 17    | 5     | 31                     | 8     | 28     | 27     | 7     | 46                     | 11     | 51     | 44     | 9      |
| 36   |     | 10 | 60 | 10 | 19                     | 6     | 19    | 22    | 5     | 43                     | 8     | 32     | 35     | 8     | 63                     | 10     | 52     | 65     | 11     |
| 37   | R05 | 10 | 60 | 25 | 1,353                  | 581   | 883   | 1,355 | 596   | 10,594                 | 3,572 | 8,702  | 10,428 | 4,528 | 6,555                  | 3,429  | 4,983  | 7,588  | 3,033  |
| 38   |     | 10 | 60 | 25 | 1,095                  | 543   | 966   | 1,153 | 583   | 6,958                  | 2,872 | 5,577  | 6,191  | 3,419 | 5,881                  | 2,454  | 4,468  | 6,420  | 2,779  |
| 39   |     | 10 | 60 | 25 | 1,191                  | 542   | 954   | 1,076 | 577   | 6,327                  | 3,351 | 5,351  | 6,883  | 3,529 | 5,218                  | 2,316  | 5,974  | 8,437  | 3,424  |
| 40   |     | 10 | 60 | 25 | 2,087                  | 664   | 1,374 | 1,836 | 798   | 1,693                  | 602   | 1,352  | 1,360  | 810   | 1,776                  | 796    | 1,014  | 1,410  | 842    |
| 41   |     | 10 | 60 | 25 | 1,265                  | 553   | 1,105 | 1,106 | 743   | 1,929                  | 610   | 1,300  | 1,815  | 911   | 1,855                  | 793    | 1,843  | 1,957  | 1,160  |
| 42   |     | 10 | 60 | 25 | 1,599                  | 541   | 1,311 | 1,625 | 736   | 1,910                  | 874   | 1,647  | 1,903  | 876   | 2,698                  | 751    | 1,957  | 2,815  | 1,209  |
| 43   |     | 10 | 60 | 25 | 51                     | 15    | 56    | 51    | 13    | 84                     | 22    | 77     | 80     | 19    | 98                     | 24     | 83     | 107    | 20     |
| 44   |     | 10 | 60 | 25 | 71                     | 22    | 78    | 71    | 18    | 96                     | 30    | 104    | 96     | 21    | 111                    | 31     | 100    | 126    | 24     |
| 45   |     | 10 | 60 | 25 | 88                     | 23    | 75    | 97    | 24    | 124                    | 31    | 121    | 114    | 25    | 120                    | 31     | 123    | 147    | 31     |
| 46   | R06 | 10 | 60 | 50 | 1,339                  | 312   | 748   | 1,149 | 337   | 4,054                  | 904   | 2,720  | 4,372  | 1,033 | 4,215                  | 1,542  | 2,128  | 4,338  | 1,737  |
| 47   |     | 10 | 60 | 50 | 1,299                  | 499   | 800   | 1,226 | 381   | 4,128                  | 1,459 | 3,681  | 4,930  | 1,604 | 8,410                  | 3,239  | 4,079  | 7,545  | 3,537  |
| 48   |     | 10 | 60 | 50 | 1,067                  | 584   | 1,046 | 1,152 | 342   | 28,691                 | 5,085 | 10,608 | 28,060 | 7,573 | 49,501                 | 18,956 | 36,189 | 39,608 | 30,555 |
| 49   |     | 10 | 60 | 50 | 2,342                  | 446   | 1,489 | 2,028 | 563   | 3,511                  | 1,007 | 1,891  | 3,454  | 987   | 5,075                  | 1,490  | 2,953  | 6,230  | 1,598  |
| 50   |     | 10 | 60 | 50 | 3,515                  | 1,532 | 2,797 | 3,622 | 1,746 | 14,871                 | 5,061 | 7,050  | 13,836 | 6,446 | 13,825                 | 6,601  | 11,931 | 16,541 | 7,441  |
| 51   |     | 10 | 60 | 50 | 4,477                  | 1,235 | 3,479 | 5,311 | 1,904 | 16,371                 | 4,917 | 10,630 | 18,755 | 7,309 | 42,988                 | 16,932 | 28,730 | 41,414 | 26,956 |
| 52   |     | 10 | 60 | 50 | 57                     | 16    | 45    | 61    | 15    | 89                     | 48    | 81     | 97     | 34    | 110                    | 52     | 86     | 122    | 40     |
| 53   |     | 10 | 60 | 50 | 131                    | 39    | 99    | 126   | 35    | 174                    | 70    | 168    | 182    | 59    | 209                    | 59     | 170    | 241    | 63     |
| 54   |     | 10 | 60 | 50 | 1,713                  | 693   | 978   | 1,734 | 783   | 3,394                  | 1,408 | 3,011  | 3,116  | 1,741 | 5,953                  | 2,495  | 3,554  | 4,826  | 2,403  |

**Table S2 Performance of Variants of BBC Algorithm on Set R01-R09 Instances (continued)**

| Ins. | Set | N  | A  | K  | CPU Time (s) for  S =2 |        |        |        |        | CPU Time (s) for  S =3 |        |        |        |        | CPU Time (s) for  S =4 |        |        |        |        |
|------|-----|----|----|----|------------------------|--------|--------|--------|--------|------------------------|--------|--------|--------|--------|------------------------|--------|--------|--------|--------|
|      |     |    |    |    | BBC1                   | BBC2   | BBC3   | BBC4   | BBC5   | BBC1                   | BBC2   | BBC3   | BBC4   | BBC5   | BBC1                   | BBC2   | BBC3   | BBC4   | BBC5   |
| 55   | R07 | 10 | 82 | 10 | 110                    | 28     | 43     | 108    | 26     | 1,043                  | 368    | 435    | 1,145  | 289    | 5,124                  | 1,899  | 3,624  | 5,797  | 2,574  |
| 56   |     | 10 | 82 | 10 | 81                     | 22     | 66     | 90     | 34     | 765                    | 216    | 460    | 729    | 289    | 4,551                  | 2,090  | 3,266  | 4,944  | 1,920  |
| 57   |     | 10 | 82 | 10 | 107                    | 27     | 70     | 135    | 39     | 640                    | 199    | 426    | 638    | 228    | 5,774                  | 1,592  | 3,137  | 5,943  | 2,229  |
| 58   |     | 10 | 82 | 10 | 231                    | 63     | 111    | 242    | 59     | 1,995                  | 689    | 1,341  | 2,481  | 734    | 3,358                  | 1,070  | 3,151  | 4,059  | 1,388  |
| 59   |     | 10 | 82 | 10 | 140                    | 36     | 123    | 147    | 59     | 1,014                  | 332    | 604    | 1,058  | 460    | 4,069                  | 1,129  | 2,425  | 4,209  | 1,493  |
| 60   |     | 10 | 82 | 10 | 95                     | 27     | 76     | 96     | 38     | 1,180                  | 356    | 579    | 1,292  | 402    | 2,874                  | 1,335  | 2,062  | 2,771  | 1,474  |
| 61   |     | 10 | 82 | 10 | 248                    | 50     | 178    | 329    | 65     | 333                    | 97     | 177    | 420    | 107    | 279                    | 73     | 165    | 331    | 70     |
| 62   |     | 10 | 82 | 10 | 169                    | 48     | 125    | 129    | 57     | 295                    | 71     | 213    | 289    | 89     | 335                    | 102    | 246    | 274    | 98     |
| 63   |     | 10 | 82 | 10 | 132                    | 40     | 109    | 154    | 54     | 298                    | 92     | 212    | 218    | 97     | 380                    | 88     | 281    | 442    | 115    |
| 64   | R08 | 10 | 83 | 25 | 776                    | 181    | 493    | 786    | 252    | 21,775                 | 5,506  | 8,815  | 23,685 | 6,028  | 83,289                 | 36,798 | 65,651 | 80,367 | 50,005 |
| 65   |     | 10 | 83 | 25 | 808                    | 409    | 541    | 780    | 341    | 8,788                  | 3,387  | 7,019  | 10,818 | 4,152  | 76,940                 | 21,922 | 64,290 | 64,934 | 23,498 |
| 66   |     | 10 | 83 | 25 | 518                    | 210    | 339    | 571    | 263    | 4,552                  | 2,365  | 5,453  | 5,390  | 3,044  | 71,651                 | 20,428 | 46,083 | 60,988 | 21,950 |
| 67   |     | 10 | 83 | 25 | 2,496                  | 664    | 1,476  | 2,821  | 1,059  | 31,663                 | 10,130 | 16,178 | 31,072 | 9,742  | 72,846                 | 49,036 | 59,412 | 71,716 | 68,955 |
| 68   |     | 10 | 83 | 25 | 1,909                  | 701    | 1,085  | 1,921  | 721    | 12,246                 | 5,314  | 11,895 | 13,821 | 6,410  | 78,099                 | 45,106 | 70,694 | 68,040 | 47,403 |
| 69   |     | 10 | 83 | 25 | 1,227                  | 348    | 715    | 1,190  | 537    | 11,250                 | 5,620  | 8,037  | 11,230 | 6,492  | 76,033                 | 14,511 | 48,714 | 49,121 | 28,251 |
| 70   |     | 10 | 83 | 25 | 2,906                  | 1,159  | 2,027  | 3,172  | 1,121  | 3,554                  | 1,093  | 2,680  | 3,453  | 1,752  | 3,978                  | 1,769  | 3,985  | 4,951  | 2,120  |
| 71   |     | 10 | 83 | 25 | 1,432                  | 593    | 1,275  | 1,505  | 538    | 2,184                  | 1,124  | 2,718  | 2,678  | 1,021  | 4,814                  | 1,752  | 4,634  | 5,471  | 1,901  |
| 72   |     | 10 | 83 | 25 | 1,519                  | 829    | 1,445  | 1,458  | 893    | 3,195                  | 1,391  | 3,048  | 2,701  | 1,372  | 4,162                  | 1,651  | 3,839  | 3,630  | 2,064  |
| 73   | R09 | 10 | 83 | 50 | 15,014                 | 6,582  | 9,678  | 16,578 | 6,969  | 79,527                 | 33,700 | 38,934 | 77,392 | 36,774 | (7.4)*                 | 42,937 | 58,795 | (5.3)  | 54,674 |
| 74   |     | 10 | 83 | 50 | 8,002                  | 3,614  | 5,782  | 7,624  | 3,923  | 59,176                 | 18,500 | 40,634 | 60,106 | 14,745 | 85,793                 | 35,880 | 62,793 | 83,753 | 41,470 |
| 75   |     | 10 | 83 | 50 | 4,982                  | 2,403  | 3,691  | 4,895  | 3,740  | 27,189                 | 12,639 | 29,868 | 26,267 | 15,297 | 72,165                 | 42,978 | 52,165 | 69,164 | 40,241 |
| 76   |     | 10 | 83 | 50 | 25,595                 | 10,616 | 11,931 | 22,529 | 10,957 | 74,382                 | 45,797 | 56,467 | 73,277 | 56,478 | (11.6)                 | 70,164 | 80,521 | (9.2)  | 76,664 |
| 77   |     | 10 | 83 | 50 | 20,354                 | 13,423 | 20,382 | 22,460 | 17,669 | 64,073                 | 33,703 | 54,281 | 70,759 | 35,999 | (3.7)                  | 62,608 | 71,598 | (2.9)  | 61,949 |
| 78   |     | 10 | 83 | 50 | 13,660                 | 10,714 | 11,417 | 13,960 | 10,177 | 33,708                 | 16,066 | 28,605 | 30,283 | 24,483 | (1.3)                  | 55,606 | 64,351 | 86,357 | 55,739 |
| 79   |     | 10 | 83 | 50 | 606                    | 189    | 520    | 604    | 195    | 819                    | 208    | 620    | 767    | 249    | 1,013                  | 264    | 880    | 1,136  | 303    |
| 80   |     | 10 | 83 | 50 | 746                    | 246    | 664    | 713    | 313    | 1,509                  | 269    | 763    | 1,135  | 292    | 1,067                  | 415    | 1,170  | 1,302  | 506    |
| 81   |     | 10 | 83 | 50 | 1,503                  | 440    | 1,188  | 1,293  | 562    | 1,883                  | 597    | 1,459  | 1,927  | 826    | 2,520                  | 727    | 2,165  | 2,971  | 770    |

\* () indicates the gap at the time limit

**Table S3 Performance of Variants of BBC Algorithm on Set R10 to R18 Instances**

| Ins. | Set | N  | A   | K   | CPU Time (s) for  S  = 2 |        |        | CPU Time (s) for  S  = 3 |        |        | CPU Time (s) for  S  = 4 |        |        |
|------|-----|----|-----|-----|--------------------------|--------|--------|--------------------------|--------|--------|--------------------------|--------|--------|
|      |     |    |     |     | BBC2                     | BBC3   | BBC5   | BBC2                     | BBC3   | BBC5   | BBC2                     | BBC3   | BBC5   |
| 82   | R10 | 20 | 120 | 40  | 16,358                   | 21,935 | 16,997 | 41,430                   | 73,387 | 59,250 | 81,474                   | (4.8)* | 83,208 |
| 83   |     | 20 | 120 | 40  | 10,526                   | 19,755 | 13,994 | 32,679                   | 66,082 | 38,693 | (11)                     | (15.8) | (11.1) |
| 84   |     | 20 | 120 | 40  | 8,235                    | 9,782  | 8,392  | 24,862                   | 51,325 | 31,439 | 35,079                   | 66,078 | 52,316 |
| 85   |     | 20 | 120 | 40  | 51,360                   | 69,034 | 55,916 | (1.1)                    | (4.6)  | (1.1)  | 85,039                   | (17.4) | (10.5) |
| 86   |     | 20 | 120 | 40  | 24,454                   | 33,990 | 28,850 | 34,090                   | (0.8)  | 50,767 | (9.1)                    | (20.3) | (19.2) |
| 87   |     | 20 | 120 | 40  | 14,274                   | 20,590 | 16,656 | 32,802                   | 67,807 | 29,639 | 53,183                   | (9)    | 76,177 |
| 88   |     | 20 | 120 | 40  | 1,494                    | 5,675  | 1,552  | 1,647                    | 7,598  | 1,689  | 1,962                    | 9,041  | 2,397  |
| 89   |     | 20 | 120 | 40  | 1,718                    | 9,055  | 1,723  | 3,845                    | 11,549 | 3,378  | 5,905                    | 13,346 | 4,498  |
| 90   |     | 20 | 120 | 40  | 2,155                    | 6,983  | 2,958  | 4,717                    | 14,590 | 5,554  | 6,446                    | 17,118 | 6,770  |
| 91   | R11 | 20 | 120 | 100 | 25,138                   | (1.2)  | 34,932 | (9.2)                    | (12.2) | (9.5)  | (16.2)                   | (26.5) | (15.8) |
| 92   |     | 20 | 120 | 100 | 11,834                   | 21,411 | 17,038 | 18,757                   | 43,432 | 18,138 | 63,109                   | 73,041 | 66,462 |
| 93   |     | 20 | 120 | 100 | 8,779                    | 14,065 | 9,736  | 17,423                   | 59,353 | 24,563 | 54,008                   | 82,929 | 67,976 |
| 94   |     | 20 | 120 | 100 | 38,504                   | 57,015 | 39,438 | 34,178                   | (17.1) | 58,690 | 62,532                   | (100)  | 79,739 |
| 95   |     | 20 | 120 | 100 | 54,953                   | (1.4)  | 70,313 | (6.7)                    | (100)  | (6.8)  | (8.5)                    | (100)  | (13.2) |
| 96   |     | 20 | 120 | 100 | 59,696                   | 79,218 | 58,872 | (9.1)                    | (18.2) | (13.7) | (11.9)                   | (100)  | (22.9) |
| 97   |     | 20 | 120 | 100 | 4,229                    | 5,048  | 3,696  | 5,224                    | 8,452  | 4,669  | 4,396                    | 12,796 | 5,044  |
| 98   |     | 20 | 120 | 100 | 5,983                    | 5,715  | 4,770  | 4,889                    | 11,314 | 4,813  | 6,581                    | 15,454 | 6,351  |
| 99   |     | 20 | 120 | 100 | 3,559                    | 5,530  | 4,166  | 10,232                   | 19,047 | 13,184 | 12,986                   | 21,144 | 15,992 |
| 100  | R12 | 20 | 120 | 200 | (13.3)                   | (100)  | (100)  | (100)                    | (100)  | (100)  | (100)                    | (100)  | (100)  |
| 101  |     | 20 | 120 | 200 | (9.7)                    | (100)  | (100)  | (100)                    | (100)  | (100)  | (100)                    | (100)  | (100)  |
| 102  |     | 20 | 120 | 200 | (17.4)                   | (30.5) | (25.8) | (31.2)                   | (100)  | (39.2) | (100)                    | (100)  | (100)  |
| 103  |     | 20 | 120 | 200 | (100)                    | (100)  | (100)  | (100)                    | (100)  | (100)  | (100)                    | (100)  | (100)  |
| 104  |     | 20 | 120 | 200 | (100)                    | (100)  | (100)  | (100)                    | (100)  | (100)  | (100)                    | (100)  | (100)  |
| 105  |     | 20 | 120 | 200 | (100)                    | (100)  | (100)  | (100)                    | (100)  | (100)  | (100)                    | (100)  | (100)  |
| 106  |     | 20 | 120 | 200 | 18,459                   | 25,471 | 23,340 | 25,043                   | 32,750 | 26,570 | 27,877                   | 38,452 | 27,061 |
| 107  |     | 20 | 120 | 200 | 16,151                   | 21,689 | 19,476 | 28,790                   | 36,456 | 32,768 | 30,271                   | 51,201 | 32,166 |
| 108  |     | 20 | 120 | 200 | 15,065                   | 19,093 | 16,256 | 22,139                   | 35,214 | 31,197 | 32,604                   | 48,959 | 36,311 |
| 109  | R13 | 20 | 220 | 40  | 23,257                   | 26,391 | 25,174 | (10.4)                   | (11.8) | (10.1) | (12.2)                   | (18.3) | (17.2) |
| 110  |     | 20 | 220 | 40  | 26,565                   | 31,405 | 33,794 | 60,421                   | (14.1) | (8.4)  | 75,341                   | (5.7)  | 79,368 |
| 111  |     | 20 | 220 | 40  | 29,617                   | 33,325 | 37,754 | 82,657                   | 86,262 | 83,048 | (9.3)                    | (12.8) | (10.5) |
| 112  |     | 20 | 220 | 40  | 58,635                   | 60,821 | 56,756 | (9.7)                    | (12.4) | (12.3) | (14.2)                   | (18.4) | (16.5) |
| 113  |     | 20 | 220 | 40  | 36,554                   | 51,869 | 43,935 | 62,710                   | 75,193 | 65,010 | 78,052                   | 83,219 | 80,058 |
| 114  |     | 20 | 220 | 40  | 38,261                   | 48,449 | 46,167 | 67,447                   | 67,081 | 65,258 | 80,359                   | (6.9)  | 83,920 |
| 115  |     | 20 | 220 | 40  | 52,815                   | 72,022 | 69,920 | (6.7)                    | (11.1) | (8.4)  | (12.3)                   | (17.7) | (16.8) |
| 116  |     | 20 | 220 | 40  | 48,210                   | (8.7)  | (4.5)  | (15)                     | (23.2) | (19.2) | (21.4)                   | (28.7) | (26.4) |
| 117  |     | 20 | 220 | 40  | 45,426                   | (4.7)  | 71,231 | 69,236                   | (12.2) | (7.2)  | (17.4)                   | (24.8) | (21.1) |
| 118  | R14 | 20 | 220 | 100 | 84,466                   | (9.8)  | 85,048 | (4.4)                    | (9.8)  | (5.2)  | (7.3)                    | (13.8) | (9.5)  |
| 119  |     | 20 | 220 | 100 | (3.9)                    | (14.7) | (3.6)  | (10.7)                   | (17.8) | (11.6) | (14.3)                   | (27.8) | (17.7) |
| 120  |     | 20 | 220 | 100 | (5.2)                    | (11.1) | (9.6)  | (100)                    | (100)  | (100)  | (100)                    | (100)  | (100)  |
| 121  |     | 20 | 220 | 100 | (10.9)                   | (26)   | (14.7) | (33.9)                   | (100)  | (100)  | (38.4)                   | (100)  | (100)  |
| 122  |     | 20 | 220 | 100 | (21.5)                   | (100)  | (100)  | (21.3)                   | (100)  | (27.4) | (27.3)                   | (100)  | (32.6) |
| 123  |     | 20 | 220 | 100 | (6.3)                    | (16)   | (8.1)  | (9.4)                    | (22.6) | (13.5) | (17.2)                   | (32.7) | (21.2) |
| 124  |     | 20 | 220 | 100 | (100)                    | (100)  | (100)  | (25.2)                   | (36.2) | (31.3) | (100)                    | (100)  | (100)  |
| 125  |     | 20 | 220 | 100 | (100)                    | (100)  | (100)  | (100)                    | (100)  | (100)  | (100)                    | (100)  | (100)  |
| 126  |     | 20 | 220 | 100 | (1.7)                    | (9.6)  | (1.5)  | (9.7)                    | (20.7) | (16.3) | (15.8)                   | (38.3) | (24.2) |
| 127  | R15 | 20 | 220 | 200 | (100)                    | (100)  | (100)  | (100)                    | (100)  | (100)  | (100)                    | (100)  | (100)  |
| 128  |     | 20 | 220 | 200 | (100)                    | (100)  | (100)  | (100)                    | (100)  | (100)  | (100)                    | (100)  | (100)  |
| 129  |     | 20 | 220 | 200 | (52.1)                   | (100)  | (100)  | (100)                    | (100)  | (100)  | (100)                    | (100)  | (100)  |
| 130  |     | 20 | 220 | 200 | (100)                    | (100)  | (100)  | (100)                    | (100)  | (100)  | (100)                    | (100)  | (100)  |
| 131  |     | 20 | 220 | 200 | (100)                    | (100)  | (100)  | (100)                    | (100)  | (100)  | (100)                    | (100)  | (100)  |
| 132  |     | 20 | 220 | 200 | (100)                    | (100)  | (100)  | (100)                    | (100)  | (100)  | (100)                    | (100)  | (100)  |
| 133  |     | 20 | 220 | 200 | (32.2)                   | (100)  | (48.2) | (17.3)                   | (100)  | (100)  | (100)                    | (100)  | (100)  |
| 134  |     | 20 | 220 | 200 | (20.7)                   | (33)   | (26.1) | (30.4)                   | (100)  | (38.5) | (100)                    | (100)  | (100)  |
| 135  |     | 20 | 220 | 200 | (24.1)                   | (38)   | (31.4) | (34.4)                   | (100)  | (39.4) | (100)                    | (100)  | (100)  |
| 136  | R16 | 20 | 314 | 40  | 32,129                   | 41,964 | 38,287 | 53,525                   | 66,086 | 63,643 | 65,286                   | 83,205 | 77,614 |
| 137  |     | 20 | 314 | 40  | 36,011                   | 53,860 | 51,528 | 56,705                   | 74,485 | 70,239 | 73,897                   | (18.3) | (14.6) |
| 138  |     | 20 | 314 | 40  | 46,403                   | 58,601 | 55,054 | 60,059                   | (10.3) | (8.8)  | (13.3)                   | (19.3) | (16.2) |
| 139  |     | 20 | 314 | 40  | 61,930                   | 66,893 | 65,106 | (13.5)                   | (18.4) | (14.2) | (16.5)                   | (22.6) | (19.4) |
| 140  |     | 20 | 314 | 40  | 48,703                   | 59,621 | 47,479 | 61,055                   | (9.2)  | 64,037 | 72,637                   | (9.6)  | 78,356 |
| 141  |     | 20 | 314 | 40  | 77,614                   | 82,896 | 79,040 | (8.2)                    | (16.2) | (10.2) | (13.8)                   | (20.6) | (17.3) |
| 142  |     | 20 | 314 | 40  | 67,043                   | 80,677 | 63,647 | (10.9)                   | (18)   | (13.2) | (16.5)                   | (24.9) | (21.5) |
| 143  |     | 20 | 314 | 40  | 73,190                   | 86,317 | 72,483 | (19.8)                   | (26.7) | (23.7) | (23.6)                   | (28.6) | (25.5) |
| 144  |     | 20 | 314 | 40  | 59,666                   | (9.1)  | (7.4)  | (17.6)                   | (18.9) | (13)   | (15.5)                   | (19.4) | (15.4) |

\* () indicates the gap at the time limit

**Table S3 Performance of Variants of BBC Algorithm on Set R10 to R18 Instances (continued)**

| Ins. | Set | $ N $ | $ A $ | $ K $ | CPU Time(s) for $ S =2$ |        |        | CPU Time (s) for $ S =3$ |        |        | CPU Time (s) for $ S =4$ |       |        |
|------|-----|-------|-------|-------|-------------------------|--------|--------|--------------------------|--------|--------|--------------------------|-------|--------|
|      |     |       |       |       | BBC2                    | BBC3   | BBC5   | BBC2                     | BBC3   | BBC5   | BBC2                     | BBC3  | BBC5   |
| 145  | R17 | 20    | 318   | 100   | 85,679                  | (16.3) | (11.5) | (7.5)                    | (18.3) | (14.5) | (11.3)                   | (100) | (20.3) |
| 146  |     | 20    | 318   | 100   | (100)                   | (100)  | (100)  | (100)                    | (100)  | (100)  | (100)                    | (100) | (100)  |
| 147  |     | 20    | 318   | 100   | (23)                    | (100)  | (100)  | (27.6)                   | (100)  | (100)  | (33.2)                   | (100) | (100)  |
| 148  |     | 20    | 318   | 100   | (25.3)                  | (28.1) | (25.1) | (30.1)                   | (100)  | (29.8) | (36.8)                   | (100) | (43.6) |
| 149  |     | 20    | 318   | 100   | (35.1)                  | (100)  | (37.8) | (39.6)                   | (100)  | (39.3) | (100)                    | (100) | (100)  |
| 150  |     | 20    | 318   | 100   | (26.1)                  | (100)  | (100)  | (30.6)                   | (100)  | (100)  | (38.8)                   | (100) | (100)  |
| 151  |     | 20    | 318   | 100   | (100)                   | (100)  | (100)  | (100)                    | (100)  | (100)  | (100)                    | (100) | (100)  |
| 152  |     | 20    | 318   | 100   | (100)                   | (100)  | (100)  | (100)                    | (100)  | (100)  | (100)                    | (100) | (100)  |
| 153  |     | 20    | 318   | 100   | (100)                   | (100)  | (100)  | (100)                    | (100)  | (100)  | (100)                    | (100) | (100)  |
| 154  | R18 | 20    | 315   | 200   | (100)                   | (100)  | (100)  | (100)                    | (100)  | (100)  | (100)                    | (100) | (100)  |
| 155  |     | 20    | 315   | 200   | (100)                   | (100)  | (100)  | (100)                    | (100)  | (100)  | (100)                    | (100) | (100)  |
| 156  |     | 20    | 315   | 200   | (100)                   | (100)  | (100)  | (100)                    | (100)  | (100)  | (100)                    | (100) | (100)  |
| 157  |     | 20    | 315   | 200   | (100)                   | (100)  | (100)  | (100)                    | (100)  | (100)  | (100)                    | (100) | (100)  |
| 158  |     | 20    | 315   | 200   | (100)                   | (100)  | (100)  | (100)                    | (100)  | (100)  | (100)                    | (100) | (100)  |
| 159  |     | 20    | 315   | 200   | (100)                   | (100)  | (100)  | (100)                    | (100)  | (100)  | (100)                    | (100) | (100)  |
| 160  |     | 20    | 315   | 200   | (100)                   | (100)  | (100)  | (100)                    | (100)  | (100)  | (100)                    | (100) | (100)  |
| 161  |     | 20    | 315   | 200   | (100)                   | (100)  | (100)  | (100)                    | (100)  | (100)  | (100)                    | (100) | (100)  |
| 162  |     | 20    | 315   | 200   | (100)                   | (100)  | (100)  | (100)                    | (100)  | (100)  | (100)                    | (100) | (100)  |

**Table S4 Comparison of the Performance of MibS Solver and BBC2 Algorithm**

| $ N ,  A ,  K $ | $B$ | MibS     |                 | BBC2     |                 |
|-----------------|-----|----------|-----------------|----------|-----------------|
|                 |     | Time (s) | Obj. Fun. Value | Time (s) | Obj. Fun. Value |
| 10, 15, 5       | 1   | 11       | 138,749         | < 1      | 138,749         |
|                 | 2   | 14       | 292,166         | < 1      | 292,166         |
|                 | 3   | 30       | 444,844         | < 1      | 444,844         |
|                 | 4   | 52       | 556,297         | < 1      | 556,297         |
|                 | 5   | 54       | 635,497         | < 1      | 635,497         |
| 10, 15, 10      | 1   | 6.6      | 898,918         | < 1      | 898,918         |
|                 | 2   | 24       | 1,012,154       | < 1      | 1,012,154       |
|                 | 3   | 65       | 1,123,046       | < 1      | 1,123,046       |
|                 | 4   | 105      | 1,228,028       | < 1      | 1,228,028       |
|                 | 5   | 101      | 1,299,546       | < 1      | 1,299,546       |
| 10, 20, 5       | 1   | 260      | 331,105         | < 1      | 331,105         |
|                 | 2   | 519      | 469,584         | < 1      | 469,584         |
|                 | 3   | 648      | 573,549         | < 1      | 573,549         |
|                 | 4   | 671      | 576,106         | < 1      | 576,106         |
|                 | 5   | 851      | 637,286         | < 1      | 637,286         |
| 10, 20, 10      | 1   | 176      | 592,579         | < 1      | 592,579         |
|                 | 2   | 655      | 1,038,001       | < 1      | 1,038,001       |
|                 | 3   | 797      | 1,164,033       | < 1      | 1,164,033       |
|                 | 4   | 907      | 1,270,589       | < 1      | 1,270,589       |
|                 | 5   | 1,260    | 1,305,904       | < 1      | 1,305,904       |

**Table S5 Performance of BBC2 Algorithm for Uncertain Demand and Interdiction Budget**

| Set     | $ \Omega  = 16$ |        |           |        |           |        | $ \Omega  = 32$ |        |           |        |           |        | $ \Omega  = 64$ |        |           |        |           |        |
|---------|-----------------|--------|-----------|--------|-----------|--------|-----------------|--------|-----------|--------|-----------|--------|-----------------|--------|-----------|--------|-----------|--------|
|         | $ S  = 2$       |        | $ S  = 3$ |        | $ S  = 4$ |        | $ S  = 2$       |        | $ S  = 3$ |        | $ S  = 4$ |        | $ S  = 2$       |        | $ S  = 3$ |        | $ S  = 4$ |        |
|         | Time            | Gap    | Time      | Gap    | Time      | Gap    | Time            | Gap    | Time      | Gap    | Time      | Gap    | Time            | Gap    | Time      | Gap    | Time      | Gap    |
| R04     | 100             | 0      | 253       | 0      | 291       | 0      | 52              | 0      | 293       | 0      | 369       | 0      | 147             | 0      | 660       | 0      | 649       | 0      |
|         | 903             | 0      | 4,692     | 0      | 4,740     | 0      | 117             | 0      | 364       | 0      | 18,872    | 0      | 161             | 0      | 461       | 0      | 5,828     | 0      |
|         | 302             | 0      | 12,622    | 0      | 27,556    | 0      | 217             | 0      | 1,586     | 0      | 1,534     | 0      | 532             | 0      | 6,975     | 0      | 1,416     | 0      |
|         | 174             | 0      | 162       | 0      | 117       | 0      | 543             | 0      | 394       | 0      | 185       | 0      | 1,252           | 0      | 709       | 0      | 233       | 0      |
|         | 1,531           | 0      | 1,567     | 0      | 897       | 0      | 3,716           | 0      | 1,638     | 0      | 8,560     | 0      | 9,989           | 0      | 17,312    | 0      | 18,043    | 0      |
|         | 1,980           | 0      | 2,356     | 0      | 4,500     | 0      | 1,331           | 0      | 4,112     | 0      | 6,482     | 0      | 4,105           | 0      | 37,898    | 0      | 19,502    | 0      |
|         | 12              | 0      | 12        | 0      | 14        | 0      | 38              | 0      | 24        | 0      | 32        | 0      | 155             | 0      | 144       | 0      | 136       | 0      |
|         | 66              | 0      | 37        | 0      | 42        | 0      | 153             | 0      | 104       | 0      | 109       | 0      | 352             | 0      | 513       | 0      | 299       | 0      |
|         | 208             | 0      | 132       | 0      | 116       | 0      | 215             | 0      | 391       | 0      | 244       | 0      | 740             | 0      | 995       | 0      | 606       | 0      |
|         | R05             | 2,272  | 0         | 3,122  | 0         | 2,218  | 0               | 3,630  | 0         | 3,938  | 0         | 2,144  | 0               | 4,891  | 0         | 4,636  | 0         | 2,582  |
| 21,001  |                 | 0      | 49,484    | 0      | 10,466    | 0      | 34,630          | 0      | 86,400    | 3.1    | 34,630    | 0      | 86,400          | 6.4    | 86,400    | 8.5    | 86,400    | 5.9    |
| 49,639  |                 | 0      | 86,400    | 5.5    | 86,400    | 9.5    | 86,400          | 6.3    | 86,400    | 12.4   | 86,400    | 13.8   | 86,400          | 15.4   | 86,400    | 20.0   | 86,400    | 22.3   |
| 831     |                 | 0      | 1,270     | 0      | 1,046     | 0      | 3,082           | 0      | 1,265     | 0      | 1,106     | 0      | 3,655           | 0      | 1,103     | 0      | 1,713     | 0      |
| 23,383  |                 | 0      | 10,687    | 0      | 13,536    | 0      | 65,814          | 0      | 38,884    | 0      | 78,051    | 0      | 86,400          | 3.5    | 70,938    | 0      | 86,400    | 2.2    |
| 86,400  |                 | 2.6    | 86,400    | 4.0    | 86,400    | 5.0    | 86,400          | 10.8   | 86,400    | 9.9    | 86,400    | 11.2   | 86,400          | 34.2   | 86,400    | 25.8   | 86,400    | 29.6   |
| 14      |                 | 0      | 18        | 0      | 22        | 0      | 28              | 0      | 28        | 0      | 36        | 0      | 71              | 0      | 71        | 0      | 81        | 0      |
| 45      |                 | 0      | 65        | 0      | 53        | 0      | 90              | 0      | 115       | 0      | 149       | 0      | 581             | 0      | 523       | 0      | 462       | 0      |
| 83      |                 | 0      | 72        | 0      | 76        | 0      | 171             | 0      | 163       | 0      | 178       | 0      | 567             | 0      | 682       | 0      | 615       | 0      |
| R06     |                 | 1,814  | 0         | 8,486  | 0         | 4,386  | 0               | 11,387 | 0         | 23,003 | 0         | 6,660  | 0               | 21,557 | 0         | 68,702 | 0         | 41,603 |
|         | 86,400          | 3.1    | 86,400    | 6.6    | 86,400    | 8.3    | 86,400          | 6.5    | 86,400    | 15.8   | 86,400    | 14.0   | 86,400          | 9.2    | 86,400    | 18.1   | 86,400    | 27.2   |
|         | 86,400          | 7.3    | 86,400    | 14.7   | 86,400    | 18.1   | 86,400          | 16.3   | 86,400    | 28.4   | 86,400    | 31.6   | 86,400          | 11.4   | 86,400    | 32.6   | 86,400    | 36.9   |
|         | 3,129           | 0      | 3,873     | 0      | 3,477     | 0      | 12,406          | 0      | 21,375    | 0      | 12,993    | 0      | 56,036          | 0      | 67,541    | 0      | 85,170    | 0      |
|         | 86,400          | 2.9    | 86,400    | 7.1    | 86,400    | 6.6    | 86,400          | 8.7    | 86,400    | 11.9   | 86,400    | 15.7   | 86,400          | 10.7   | 86,400    | 15.3   | 86,400    | 17.1   |
|         | 86,400          | 6.4    | 86,400    | 13.3   | 86,400    | 13.7   | 86,400          | 12.7   | 86,400    | 20.7   | 86,400    | 15.4   | 86,400          | 10.1   | 86,400    | 22.6   | 86,400    | 22.4   |
|         | 19              | 0      | 24        | 0      | 39        | 0      | 25              | 0      | 33        | 0      | 53        | 0      | 46              | 0      | 48        | 0      | 70        | 0      |
|         | 72              | 0      | 84        | 0      | 122       | 0      | 103             | 0      | 125       | 0      | 190       | 0      | 320             | 0      | 365       | 0      | 362       | 0      |
|         | 14,062          | 0      | 45,776    | 0      | 86,400    | 1.9    | 86,400          | 2.5    | 86,400    | 2.9    | 86,400    | 7.0    | 86,400          | 8.0    | 86,400    | 6.0    | 86,400    | 30.2   |
|         | R07             | 56     | 0         | 1,908  | 0         | 86,400 | 1.2             | 71     | 0         | 3,363  | 0         | 86,400 | 2.0             | 73     | 0         | 5,187  | 0         | 86,400 |
| 43      |                 | 0      | 3,657     | 0      | 86,400    | 6.1    | 54              | 0      | 17,876    | 0      | 86,400    | 8.8    | 70              | 0      | 49,251    | 0      | 86,400    | 11.3   |
| 53      |                 | 0      | 19,114    | 0      | 86,400    | 11.5   | 76              | 0      | 18,015    | 0      | 86,400    | 12.4   | 80              | 0      | 86,400    | 2.2    | 86,400    | 17.5   |
| 60      |                 | 0      | 8,639     | 0      | 26,299    | 0      | 84              | 0      | 66,495    | 0      | 35,190    | 0      | 95              | 0      | 86,400    | 0.8    | 86,400    | 1.0    |
| 62      |                 | 0      | 86,400    | 1.1    | 86,400    | 10.4   | 132             | 0      | 86,400    | 1.3    | 86,400    | 8.0    | 339             | 0      | 86,400    | 2.5    | 86,400    | 10.5   |
| 65      |                 | 0      | 86,400    | 2.9    | 86,400    | 11.8   | 141             | 0      | 86,400    | 2.0    | 86,400    | 14.4   | 268             | 0      | 86,400    | 4.0    | 86,400    | 16.4   |
| 159     |                 | 0      | 170       | 0      | 169       | 0      | 310             | 0      | 514       | 0      | 499       | 0      | 532             | 0      | 575       | 0      | 854       | 0      |
| 3,677   |                 | 0      | 2,947     | 0      | 4,401     | 0      | 26,054          | 0      | 23,274    | 0      | 20,791    | 0      | 23,364          | 0      | 29,665    | 0      | 30,103    | 0      |
| 7,821   |                 | 0      | 10,879    | 0      | 9,645     | 0      | 41,583          | 0      | 66,909    | 0      | 43,403    | 0      | 54,813          | 0      | 71,027    | 0      | 86,400    | 1.1    |
| R08     |                 | 695    | 0         | 86,400 | 2.2       | 86,400 | 8               | 586    | 0         | 86,400 | 2.4       | 86,400 | 8.2             | 684    | 0         | 86,400 | 3.5       | 86,400 |
|         | 2,418           | 0      | 86,400    | 10.7   | 86,400    | 30.0   | 3,185           | 0      | 86,400    | 12.3   | 86,400    | 28.4   | 9,329           | 0      | 86,400    | 12.0   | 86,400    | 35.8   |
|         | 1,294           | 0      | 86,400    | 14.6   | 86,400    | 30.3   | 1,531           | 0      | 86,400    | 13.5   | 86,400    | 30.7   | 4,379           | 0      | 86,400    | 14.7   | 86,400    | 35.6   |
|         | 5,333           | 0      | 86,400    | 2.4    | 86,400    | 5.9    | 4,218           | 0      | 86,400    | 2.9    | 86,400    | 5.6    | 28,956          | 0      | 86,400    | 2.4    | 86,400    | 12.6   |
|         | 10,829          | 0      | 86,400    | 15.4   | 86,400    | 32.0   | 15,928          | 0      | 86,400    | 16.0   | 86,400    | 30.7   | 56,127          | 0      | 86,400    | 19.8   | 86,400    | 40.7   |
|         | 4,057           | 0      | 86,400    | 16.8   | 86,400    | 30.6   | 21,422          | 0      | 86,400    | 20.4   | 86,400    | 32.3   | 67,081          | 0      | 86,400    | 26.2   | 86,400    | 36.4   |
|         | 2,836           | 0      | 2,239     | 0      | 2,877     | 0      | 5,643           | 0      | 3,870     | 0      | 2,381     | 0      | 33,591          | 0      | 9,979     | 0      | 18,250    | 0      |
|         | 41,357          | 0      | 78,196    | 0      | 86,400    | 2.4    | 86,400          | 3.9    | 86,400    | 2.3    | 86,400    | 5.8    | 86,400          | 13.0   | 86,400    | 14.4   | 86,400    | 16.6   |
|         | 76,853          | 0      | 86,400    | 3.7    | 86,400    | 5.7    | 86,400          | 4.3    | 86,400    | 8.6    | 86,400    | 10.2   | 86,400          | 0.1    | 86,400    | 13.8   | 86,400    | 21.3   |
|         | R09             | 86,400 | 1.3       | 86,400 | 5.2       | 86,400 | 100.0           | 86,400 | 2.3       | 86,400 | 8.7       | 86,400 | 46.9            | 86,400 | 3.0       | 86,400 | 14.3      | 86,400 |
| 86,400  |                 | 4.5    | 86,400    | 26.7   | 86,400    | 48.3   | 86,400          | 9.6    | 86,400    | 34.7   | 86,400    | 100    | 86,400          | 15.5   | 86,400    | 41.9   | 86,400    | 55.1   |
| 86,400  |                 | 10.3   | 86,400    | 29.4   | 86,400    | 44.0   | 86,400          | 12.3   | 86,400    | 35.1   | 86,400    | 51.3   | 86,400          | 18.4   | 86,400    | 42.8   | 86,400    | 49.7   |
| 42,605  |                 | 0      | 86,400    | 4.7    | 86,400    | 100.0  | 27,843          | 0      | 86,400    | 7.3    | 86,400    | 100    | 86,400          | 3.4    | 86,400    | 10.7   | 86,400    | 100    |
| 86,400  |                 | 16.7   | 86,400    | 35.7   | 86,400    | 45.0   | 86,400          | 21.9   | 86,400    | 41.9   | 86,400    | 43.9   | 86,400          | 33.8   | 86,400    | 39.0   | 86,400    | 44.8   |
| 86,400  |                 | 21.2   | 86,400    | 38.8   | 86,400    | 41.6   | 86,400          | 30.1   | 86,400    | 39.1   | 86,400    | 45.8   | 86,400          | 35.5   | 86,400    | 40.2   | 86,400    | 48.7   |
| 1,958   |                 | 0      | 1,920     | 0      | 1,073     | 0      | 3,709           | 0      | 3,776     | 0      | 2,008     | 0      | 16,214          | 0      | 14,743    | 0      | 10,339    | 0      |
| 25,900  |                 | 0      | 20,015    | 0      | 24,545    | 0      | 59,098          | 0      | 48,102    | 0      | 31,768    | 0      | 86,400          | 1.1    | 86,400    | 1.9    | 86,400    | 3.2    |
| 58,683  |                 | 0      | 49,099    | 0      | 44,406    | 0      | 78,513          | 0      | 86,400    | 1.0    | 86,400    |        | 86,400          | 4.9    | 86,400    | 8.7    | 86,400    | 2.5    |
| Average |                 | 23,564 | 1.4       | 39,963 | 4.8       | 45,065 | 11.6            | 30,325 | 2.7       | 46,482 | 6.6       | 48,915 | 13.1            | 37,829 | 4.4       | 53,332 | 8.6       | 55,624 |

## Appendix E: Sensitivity Analysis

Figure S1 shows the effects of changing the number of scenarios on the optimal network configuration. Table S6 reports the results showing the effects of varying the weight of pre-interdiction cost ( $\Phi$ ) on the number of arcs installed in the network. The results showing the effects of varying the weight of pre-interdiction cost on the CPU time of BBC2 algorithm is presented in Table S7.

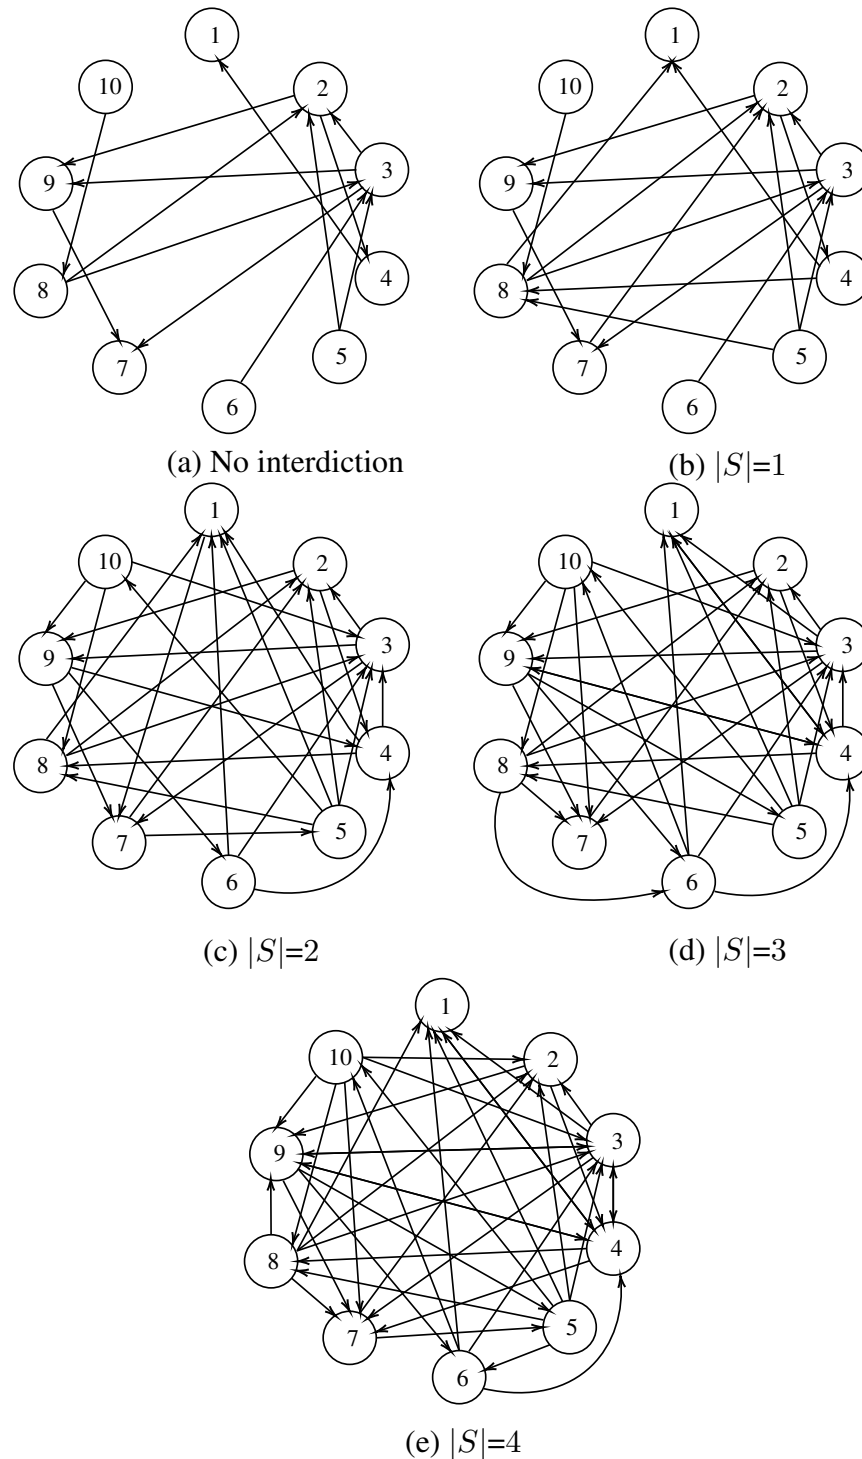

Figure S1 Effects of Changing the Number of Scenarios on Optimal Network Configuration

**Table S6** Effects of Varying Weight of Pre-interdiction Cost ( $\Phi$ ) on the Number of Arcs Installed in Network

| N  | A   | K  | $\Phi = 1$ | No. of Arcs for $ S  = 2$ |              |              |            | No. of Arcs for $ S  = 3$ |              |              |            | No. of Arcs for $ S  = 4$ |              |              |            |
|----|-----|----|------------|---------------------------|--------------|--------------|------------|---------------------------|--------------|--------------|------------|---------------------------|--------------|--------------|------------|
|    |     |    |            | $\Phi = 0.8$              | $\Phi = 0.5$ | $\Phi = 0.2$ | $\Phi = 0$ | $\Phi = 0.8$              | $\Phi = 0.5$ | $\Phi = 0.2$ | $\Phi = 0$ | $\Phi = 0.8$              | $\Phi = 0.5$ | $\Phi = 0.2$ | $\Phi = 0$ |
| 10 | 82  | 10 | 29         | 36                        | 36           | 36           | 36         | 36                        | 37           | 37           | 37         | 36                        | 37           | 37           | 37         |
| 10 | 83  | 25 | 24         | 41                        | 41           | 42           | 44         | 49                        | 50           | 50           | 51         | 58                        | 59           | 59           | 60         |
| 10 | 83  | 25 | 39         | 48                        | 48           | 49           | 50         | 51                        | 53           | 53           | 53         | 51                        | 55           | 55           | 55         |
| 10 | 83  | 50 | 41         | 59                        | 61           | 63           | 63         | 63                        | 64           | 64           | 64         | 64                        | 64           | 65           | 66         |
| 20 | 120 | 40 | 102        | 103                       | 105          | 105          | 106        | 104                       | 105          | 106          | 107        | 104                       | 106          | 106          | 108        |
| 20 | 120 | 40 | 79         | 84                        | 85           | 85           | 86         | 87                        | 88           | 90           | 91         | 89                        | 91           | 91           | 92         |

**Table S7** Effects of Varying the Weight of Pre-interdiction Cost ( $\Phi$ ) on CPU Time (s)

| Set         | Instance | CPU Time (s) for $ S  = 2$ |              |              | CPU Time (s) for $ S  = 3$ |              |              | CPU Time (s) for $ S  = 4$ |              |              |
|-------------|----------|----------------------------|--------------|--------------|----------------------------|--------------|--------------|----------------------------|--------------|--------------|
|             |          | $\Phi = 0.8$               | $\Phi = 0.5$ | $\Phi = 0.2$ | $\Phi = 0.8$               | $\Phi = 0.5$ | $\Phi = 0.2$ | $\Phi = 0.8$               | $\Phi = 0.5$ | $\Phi = 0.2$ |
| R07         | 55       | 28                         | 27           | 33           | 368                        | 380          | 425          | 1,899                      | 3,025        | 8,447        |
|             | 56       | 22                         | 23           | 34           | 216                        | 288          | 432          | 2,090                      | 2,245        | 2,891        |
|             | 57       | 27                         | 32           | 38           | 199                        | 251          | 282          | 1,592                      | 2,269        | 2,474        |
|             | 58       | 63                         | 72           | 70           | 689                        | 794          | 966          | 1,070                      | 1,726        | 1,900        |
|             | 59       | 36                         | 47           | 68           | 332                        | 434          | 982          | 1,129                      | 1,321        | 2,304        |
|             | 60       | 27                         | 65           | 87           | 356                        | 415          | 460          | 1,335                      | 1,452        | 1,472        |
|             | 61       | 50                         | 103          | 150          | 97                         | 124          | 132          | 73                         | 119          | 168          |
|             | 62       | 48                         | 96           | 113          | 71                         | 100          | 172          | 102                        | 124          | 185          |
|             | 63       | 40                         | 97           | 123          | 92                         | 102          | 118          | 88                         | 92           | 125          |
| Arith. Mean |          | 38                         | 62           | 79           | 269                        | 321          | 441          | 1,042                      | 1,375        | 2,218        |
| Geo. Mean   |          | 36                         | 54           | 69           | 211                        | 257          | 340          | 573                        | 743          | 1,047        |
